# Supplementary material
Source: Springer Nature journal article supplement (https://www.springermedizin.de/resource/supplementary/12993_2007_142_MOESM5_ESM.pdf/9617294)

# SII Control Stimulus Response

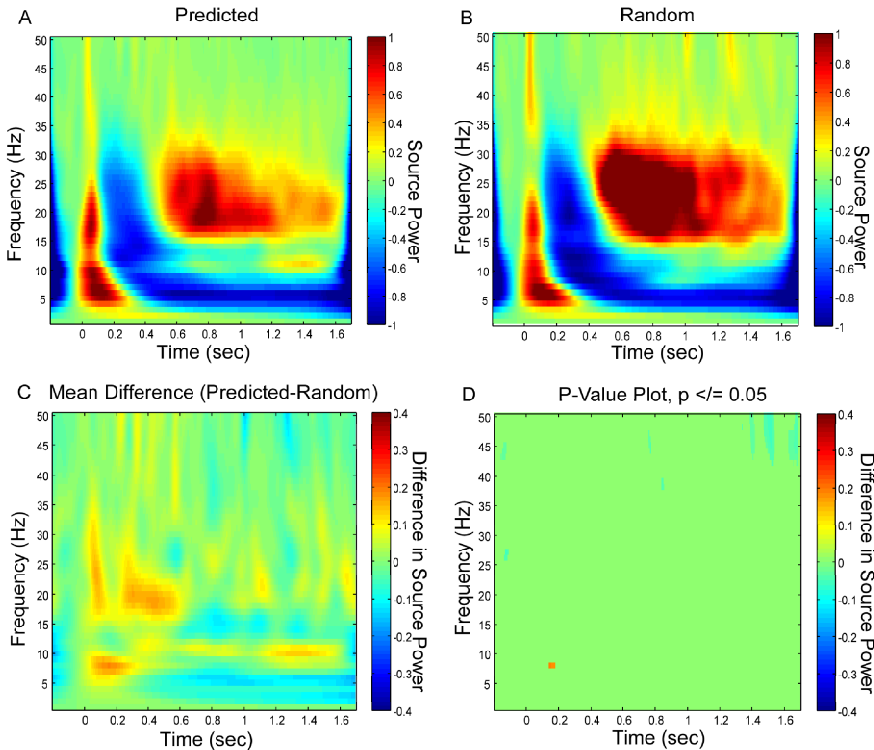

Supplement: MOESM5 [file 9617294]
